# Supplementary material
Source: Springer Nature journal article supplement (https://www.springermedizin.de/resource/supplementary/12889_2011_3143_MOESM1_ESM.pdf/9488244)

# PA Schools Number of Students

## Schools

- 0 - 199
- 200 - 349
- 350 - 549
- 550 - 999
- > 1000

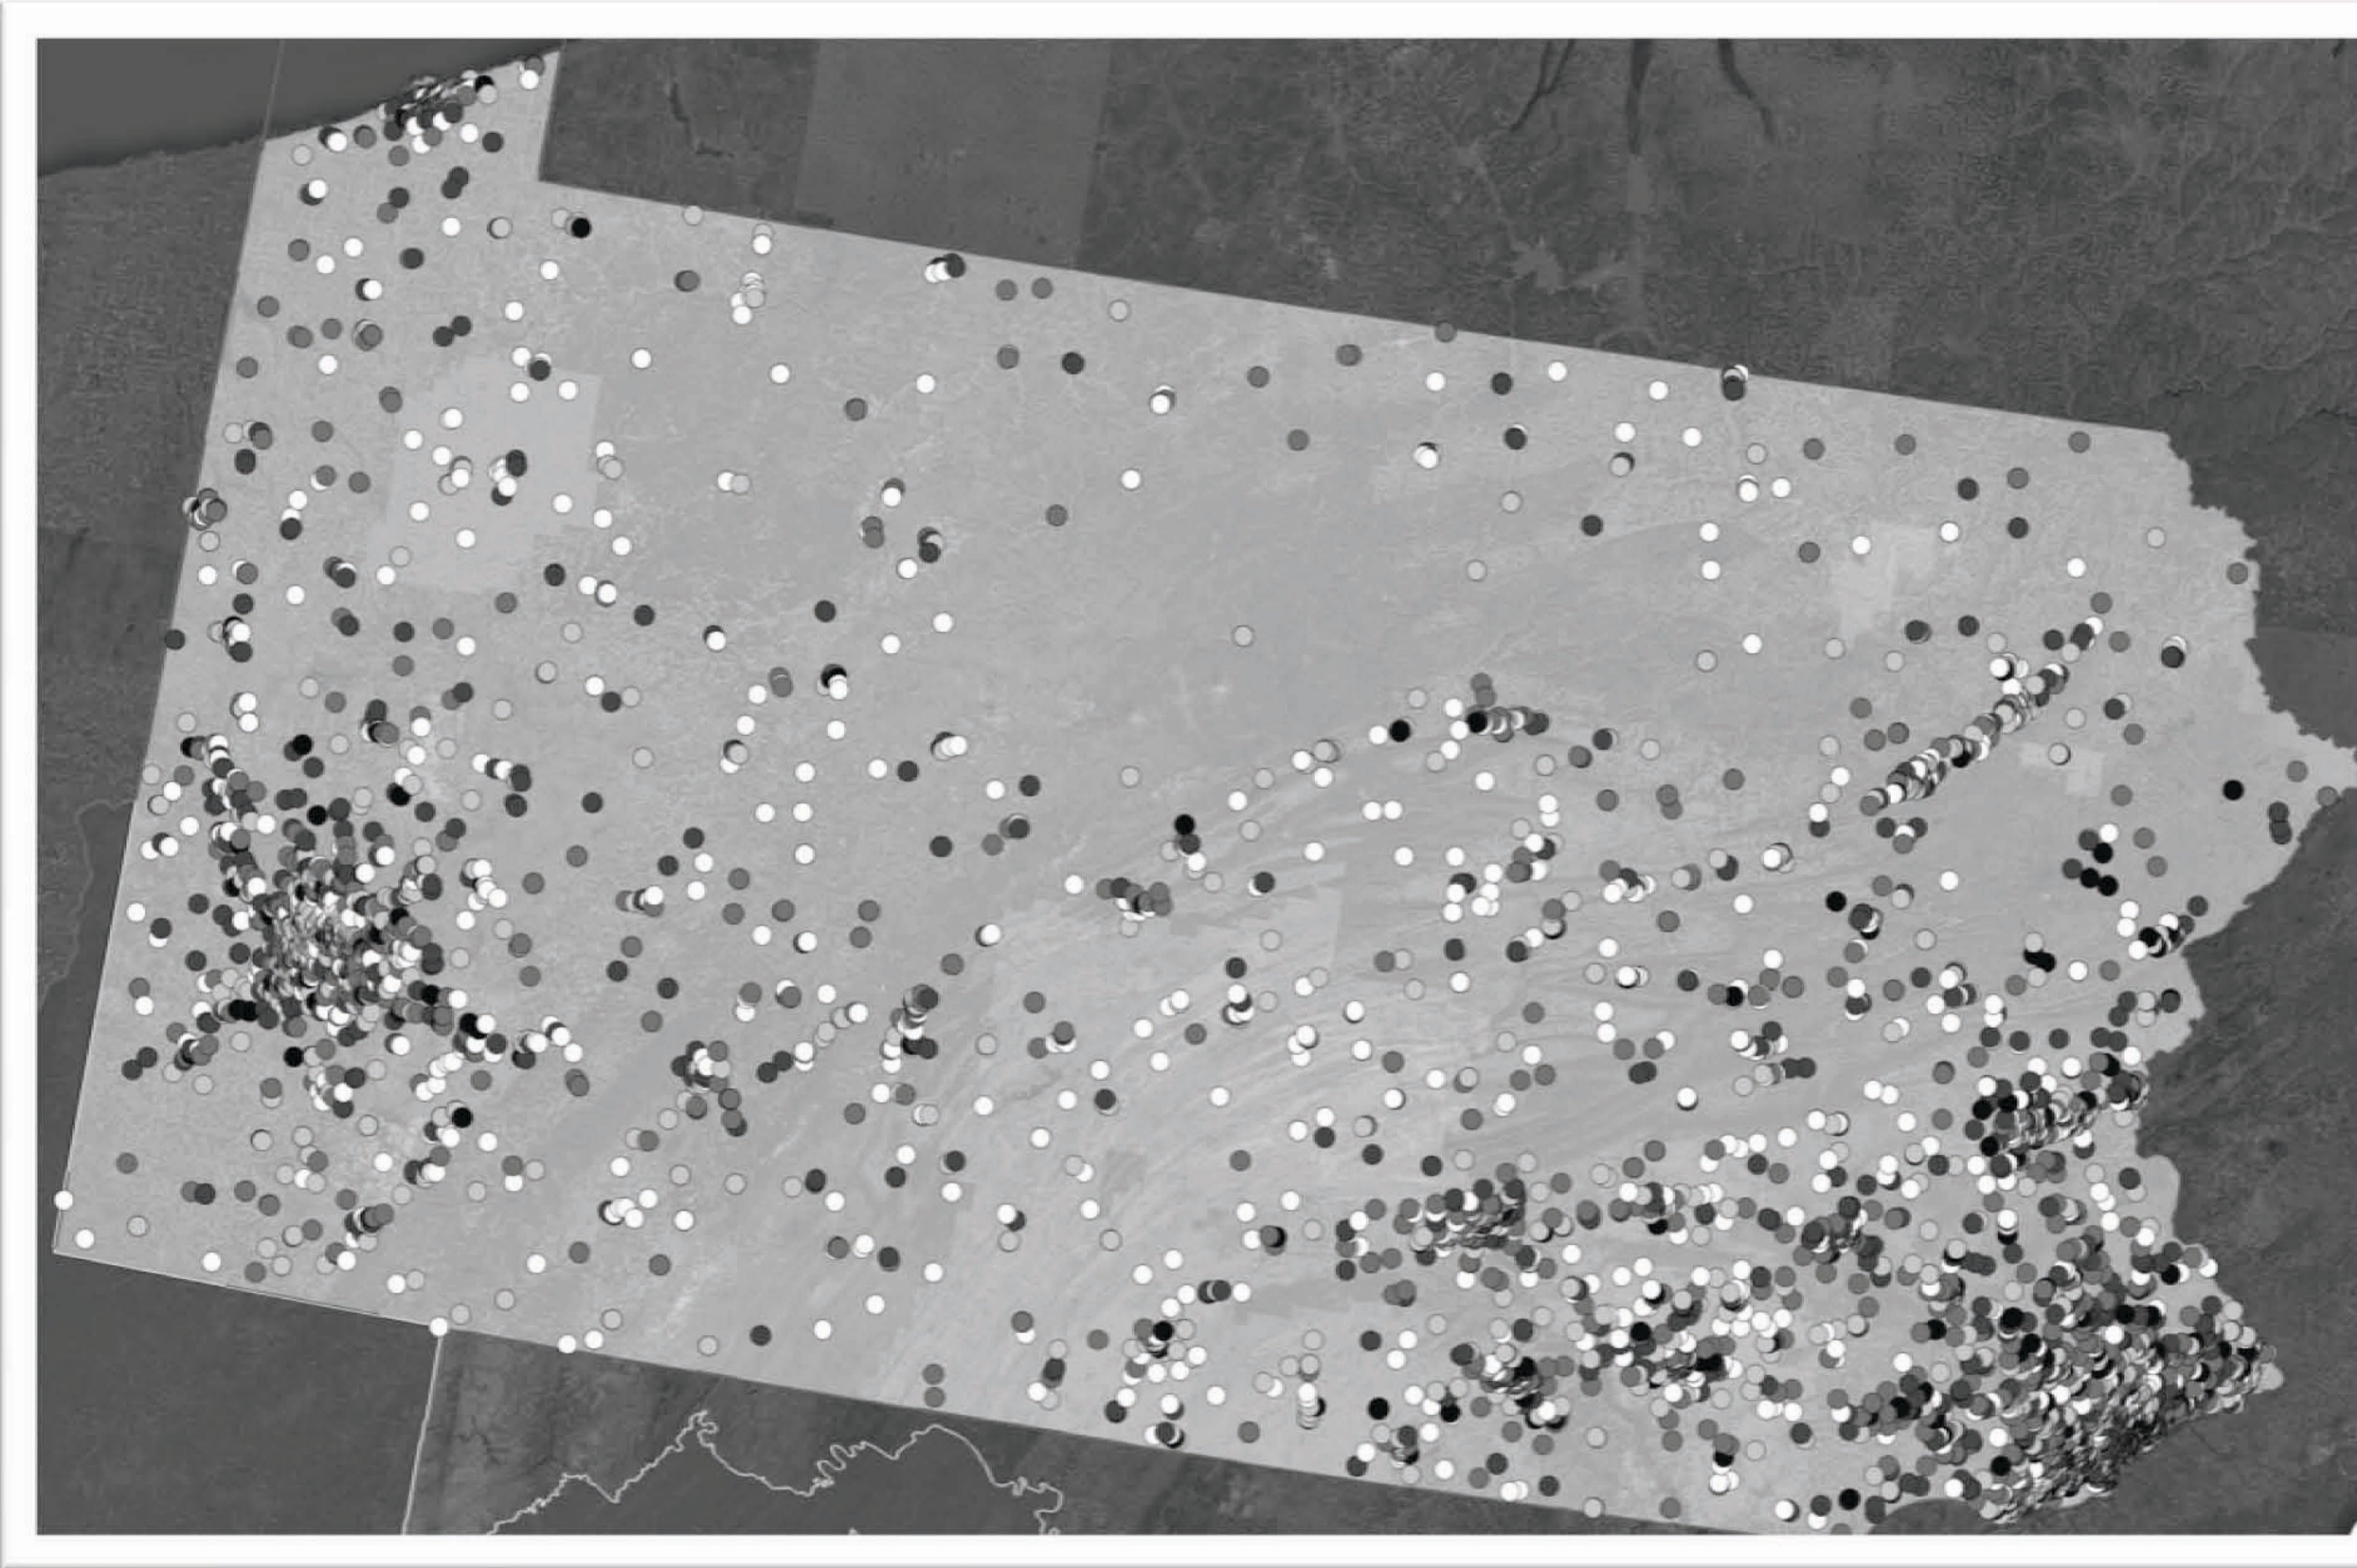

Supplement: MOESM1 [file 9488244]
